# Supplementary material for: miRNAs Copy Number Variations Repertoire as Hallmark Indicator of Cancer Species Predisposition
Source: Genes (Basel). 2022 Jun 10;13(6):1046. doi: 10.3390/genes13061046 (PMC9223155; doi:10.3390/genes13061046)
Supplement: Supplementary file 1 [file genes-13-01046-s001.zip › Vischioni_et_al_2022_supplementary_tables.xlsx]

## Sheet: S1
Table S1: Species description. Phenotype characteristics of the 9 species included in the analysis: name, mass (kg), maximum lifespan (years), metabolism (W), and “Cancer YES/NO” labelling.
Species	Common_name	Mass_kg	Lifespan_max_yr	Metabolism	Cancer
Heterocephalus_glaber	Naked_mole_rat	0.035	32	0.136	NO
Nannospalax_galili	Blind_mole_rat	0.325	21	0.585	NO
Dasypus_novemcinctus	Armadillo	3.95	22.34	4.55	NO
Loxodonta_africana	Elephant	4500	80	NA	NO
Myotis lucifugus	Little_brown_bat	0.01	34	0.051	NO
Mus_musculus	Mouse	0.02	6	0.271	YES
Rattus_norvegicus	Rat	0.28	5	1404	YES
Canis_familiaris	Dog	40	24	17.25	YES
Homo_sapiens	Human	70	80	76825	YES
a https://genomics.senescence.info/ (Tacutu, R., Thornton, D., Johnson, E., Budovsky, A., Barardo, D., Craig, T., ... & de Magalhães, J. P. (2018). Human ageing genomic resources: new and updated databases. Nucleic acids research, 46(D1), D1083-D1090.)

## Sheet: S2
Table S2: Cancer Prone vs Cancer Resistant: a two-group statistical comparison. List of the significant hits resulting from the unpaired 2-group wilcoxon test (p-value <0.05) applied on the total genomic CNVs landscape of the selected species. Our analysis, which exclusively considered the variation in the number of gene copies within different species, was able to identify genes involved in biol…
ID	[Hg]	[Ng]	[Dn]	[La]	[Ml]	[Mm]	[Rn]	[Cf]	[Hs]	p-value
CD52	0	0	0	0	0	1	1	1	1	0.00720957
CSN1S1	0	0	0	0	0	1	1	1	1	0.00720957
EEF1AKMT4	0	0	0	0	0	1	1	1	1	0.00720957
GP2	0	0	0	0	0	1	1	1	1	0.00720957
IQCM	0	0	0	0	0	1	1	1	1	0.00720957
PCDHB14	0	0	0	0	0	1	1	1	1	0.00720957
PCDHB7	0	0	0	0	0	1	1	1	1	0.00720957
RNF224	0	0	0	0	0	1	1	1	1	0.00720957
SAT1	2	2	2	2	2	3	3	3	3	0.00720957
SATL1	2	2	2	2	2	3	3	3	3	0.00720957
SMIM31	0	0	0	0	0	1	1	1	1	0.00720957
ZNF169	0	0	0	0	0	1	1	1	1	0.00720957
ABCG2	0	0	0	0	0	1	2	1	1	0.00927678
MIR424	0	0	0	0	0	1	2	1	1	0.00927678
SCARNA21	0	0	0	0	0	3	2	2	2	0.00927678
DPPA3	0	0	0	0	0	1	8	2	1	0.0104083
MIR371A	0	0	0	0	0	4	8	2	2	0.0104083
MIR372	0	0	0	0	0	4	8	2	2	0.0104083
CNGB1	1	1	0	1	1	2	2	2	2	0.0107996
CNGB3	1	1	0	1	1	2	2	2	2	0.0107996
GAR1	1	1	0	1	1	2	2	2	2	0.0107996
GJA9	3	3	2	3	3	4	4	4	4	0.0107996
GJD2	3	3	2	3	3	4	4	4	4	0.0107996
GJD3	3	3	2	3	3	4	4	4	4	0.0107996
GJD4	3	3	2	3	3	4	4	4	4	0.0107996
GJE1	3	3	2	3	3	4	4	4	4	0.0107996
NANOS1	1	2	2	2	2	3	3	3	3	0.0107996
NANOS2	1	2	2	2	2	3	3	3	3	0.0107996
NANOS3	1	2	2	2	2	3	3	3	3	0.0107996
NOS3	1	2	2	2	2	3	3	3	3	0.0107996
DMD	2	2	3	3	6	1	1	1	1	0.0141714
SCARNA20	0	1	0	1	0	3	3	5	3	0.0155412
SPAG11A	0	1	0	1	1	3	2	2	2	0.0155412
SPAG11B	0	1	0	1	1	3	2	2	2	0.0155412
EIF5	6	3	3	2	2	1	1	0	1	0.0169649
EID1	2	1	1	1	1	3	3	2	3	0.0184355
EID2	2	1	1	1	1	3	3	2	3	0.0184355
EID2B	2	1	1	1	1	3	3	2	3	0.0184355
PCDHGB1	0	0	0	0	1	2	2	1	2	0.0184355
HIST1H4D	2	3	2	1	1	5	4	9	6	0.0189429
HIST1H4J	2	3	2	1	1	5	4	9	6	0.0189429
HIST2H4A	2	3	2	1	1	5	4	9	6	0.0189429
HIST4H4	2	3	2	1	1	5	4	9	6	0.0189429
RETN	1	2	1	1	1	4	4	3	2	0.0201368
RETNLB	1	2	1	1	1	4	4	3	2	0.0201368
SCARNA16	0	0	0	1	0	2	5	2	1	0.0201368
MIR103A1	0	0	0	2	1	2	3	3	3	0.0218957
MIR103A2	0	0	0	2	1	2	3	3	3	0.0218957
MIR107	0	0	0	2	1	2	3	3	3	0.0218957
MIR124-1	1	0	0	2	0	3	3	2	3	0.0218957
MIR124-2	1	0	0	2	0	3	3	2	3	0.0218957
MIR124-3	1	0	0	2	0	3	3	2	3	0.0218957
RPLP1	4	4	4	3	7	2	3	1	1	0.0237091
SUMO2	15	8	8	4	6	3	4	3	3	0.0237091
SUMO3	15	8	8	4	6	3	4	3	3	0.0237091
SUMO4	15	8	8	4	6	3	4	3	3	0.0237091
ZFP41	1	2	1	1	0	5	2	7	22	0.0243251
ZNF100	1	2	1	1	0	5	2	7	22	0.0243251
ZNF114	1	2	1	1	0	5	2	7	22	0.0243251
ZNF253	1	2	1	1	0	5	2	7	22	0.0243251
ZNF257	1	2	1	1	0	5	2	7	22	0.0243251
ZNF430	1	2	1	1	0	5	2	7	22	0.0243251
ZNF431	1	2	1	1	0	5	2	7	22	0.0243251
ZNF479	1	2	1	1	0	5	2	7	22	0.0243251
CRYGA	1	0	0	0	0	1	2	2	1	0.0260261
KRTAP24-1	4	3	3	3	3	5	4	5	4	0.0260261
KRTAP3-1	4	3	3	3	3	5	4	5	4	0.0260261
KRTAP3-2	4	3	3	3	3	5	4	5	4	0.0260261
KRTAP3-3	4	3	3	3	3	5	4	5	4	0.0260261
SPACA7	0	1	0	0	0	2	2	1	1	0.0260261
TGIF2LX	0	0	0	1	0	2	1	1	2	0.0260261
TGIF2LY	0	0	0	1	0	2	1	1	2	0.0260261
CLEC2D	0	0	1	0	0	5	7	1	1	0.0267396
CNTNAP3	0	1	0	0	0	1	1	2	3	0.0267396
CNTNAP3B	0	1	0	0	0	1	1	2	3	0.0267396
CNTNAP3C	0	1	0	0	0	1	1	2	3	0.0267396
RHOXF1	0	0	0	0	1	2	1	3	1	0.0267396
SCARNA14	0	0	0	1	0	3	4	1	1	0.0267396
FAM237A	1	0	0	0	1	2	1	2	2	0.0281858
FAM237B	1	0	0	0	1	2	1	2	2	0.0281858
MIR506	0	0	0	5	0	2	11	6	11	0.0289182
MIR509-1	0	0	0	5	0	2	11	6	11	0.0289182
MIR511	0	0	0	5	0	2	11	6	11	0.0289182
MIR514A1	0	0	0	5	0	2	11	6	11	0.0289182
MIR514A3	0	0	0	5	0	2	11	6	11	0.0289182
MIR514B	0	0	0	5	0	2	11	6	11	0.0289182
SCARNA4	0	0	0	2	0	8	4	1	3	0.0296566
DEFB105A	1	0	0	0	1	2	1	3	2	0.0304008
DEFB105B	1	0	0	0	1	2	1	3	2	0.0304008
DEFB130A	1	2	1	0	2	4	4	2	4	0.0304008
DEFB130B	1	2	1	0	2	4	4	2	4	0.0304008
DEFB4A	1	2	1	0	2	4	4	2	4	0.0304008
DEFB4B	1	2	1	0	2	4	4	2	4	0.0304008
FLG	1	2	3	3	2	4	4	3	4	0.0304008
FLG2	1	2	3	3	2	4	4	3	4	0.0304008
HRNR	1	2	3	3	2	4	4	3	4	0.0304008
MIR378A	0	1	0	1	0	2	2	1	3	0.0304008
MIR378B	0	1	0	1	0	2	2	1	3	0.0304008
MIR378D2	0	1	0	1	0	2	2	1	3	0.0304008
RPTN	1	2	3	3	2	4	4	3	4	0.0304008
S100A16	1	2	3	3	2	4	4	3	4	0.0304008
MBD1	3	3	4	3	5	5	5	6	9	0.0311506
MBD2	3	3	4	3	5	5	5	6	9	0.0311506
MBD3	3	3	4	3	5	5	5	6	9	0.0311506
MBD3L1	3	3	4	3	5	5	5	6	9	0.0311506
MBD3L2	3	3	4	3	5	5	5	6	9	0.0311506
MBD3L2B	3	3	4	3	5	5	5	6	9	0.0311506
MBD3L3	3	3	4	3	5	5	5	6	9	0.0311506
MBD3L4	3	3	4	3	5	5	5	6	9	0.0311506
MBD3L5	3	3	4	3	5	5	5	6	9	0.0311506
PCM1	3	3	4	3	5	5	5	6	9	0.0311506
C4orf3	0	0	0	1	0	1	1	2	1	0.0318231
ERVFRD-1	0	1	0	0	0	3	1	1	1	0.0318231
FGFBP1	1	1	2	1	1	2	2	2	3	0.0318231
FGFBP2	1	1	2	1	1	2	2	2	3	0.0318231
FGFBP3	1	1	2	1	1	2	2	2	3	0.0318231
FOXJ1	1	2	2	2	2	1	0	1	1	0.0318231
FRG2	0	0	1	0	0	1	1	1	3	0.0318231
FRG2B	0	0	1	0	0	1	1	1	3	0.0318231
FRG2C	0	0	1	0	0	1	1	1	3	0.0318231
MIR1-1	0	0	0	3	0	3	3	4	3	0.0318231
MIR1-2	0	0	0	3	0	3	3	4	3	0.0318231
MIR206	0	0	0	3	0	3	3	4	3	0.0318231
MIR340	0	0	0	1	0	1	2	1	1	0.0318231
MIR542	0	0	0	1	0	1	3	1	1	0.0318231
NUPR1	1	2	1	1	1	2	3	2	2	0.0318231
NUPR2	1	2	1	1	1	2	3	2	2	0.0318231
SELENOW	0	1	0	0	0	1	2	1	1	0.0318231
SPINK14	0	0	1	0	0	1	3	1	1	0.0318231
SYNE1	2	2	2	1	2	1	0	1	1	0.0318231
CCDC8	6	8	8	5	6	13	9	8	14	0.0334328
MOAP1	6	8	8	5	6	13	9	8	14	0.0334328
PNMA1	6	8	8	5	6	13	9	8	14	0.0334328
PNMA2	6	8	8	5	6	13	9	8	14	0.0334328
PNMA3	6	8	8	5	6	13	9	8	14	0.0334328
PNMA5	6	8	8	5	6	13	9	8	14	0.0334328
PNMA6A	6	8	8	5	6	13	9	8	14	0.0334328
PNMA6E	6	8	8	5	6	13	9	8	14	0.0334328
PNMA6F	6	8	8	5	6	13	9	8	14	0.0334328
PNMA8A	6	8	8	5	6	13	9	8	14	0.0334328
PNMA8B	6	8	8	5	6	13	9	8	14	0.0334328
PNMA8C	6	8	8	5	6	13	9	8	14	0.0334328
ZCCHC12	6	8	8	5	6	13	9	8	14	0.0334328
ZCCHC18	6	8	8	5	6	13	9	8	14	0.0334328
ACOXL	1	0	0	0	0	1	1	1	1	0.0338949
ADRA2C	1	0	0	0	0	1	1	1	1	0.0338949
AGBL4	2	2	2	1	2	1	1	1	1	0.0338949
AKAP14	0	0	1	0	0	1	1	1	1	0.0338949
C2CD4C	0	0	1	0	0	1	1	1	1	0.0338949
C3orf22	0	0	1	0	0	1	1	1	1	0.0338949
C6orf201	0	0	0	0	1	1	1	1	1	0.0338949
CCDC179	0	1	0	0	0	1	1	1	1	0.0338949
CCDC185	0	0	1	0	0	1	1	1	1	0.0338949
CNBD1	0	0	0	1	0	1	1	1	1	0.0338949
COL27A1	0	0	0	0	1	1	1	1	1	0.0338949
EXOC6	3	2	3	3	3	2	2	2	2	0.0338949
EXOC6B	3	2	3	3	3	2	2	2	2	0.0338949
FAM227B	0	0	1	0	0	1	1	1	1	0.0338949
FMR1NB	0	0	0	1	0	1	1	1	1	0.0338949
FOXL1	0	1	0	0	0	1	1	1	1	0.0338949
GALP	0	1	0	0	0	1	1	1	1	0.0338949
GAS1	0	0	1	0	0	1	1	1	1	0.0338949
GFRA4	0	1	0	0	0	1	1	1	1	0.0338949
GIMAP8	0	0	0	0	1	1	1	1	1	0.0338949
GPR160	0	0	0	0	1	1	1	1	1	0.0338949
GPR88	0	1	0	0	0	1	1	1	1	0.0338949
HNRNPA0	2	2	2	1	2	1	1	1	1	0.0338949
HSBP1L1	1	0	0	0	0	1	1	1	1	0.0338949
IGIP	0	1	0	0	0	1	1	1	1	0.0338949
IGKC	0	0	1	0	0	1	1	1	1	0.0338949
IGSF23	0	0	0	0	1	1	1	1	1	0.0338949
JUND	0	1	0	0	0	1	1	1	1	0.0338949
KLF16	0	1	0	0	0	1	1	1	1	0.0338949
KPRP	0	0	1	0	0	1	1	1	1	0.0338949
KRT9	0	1	0	0	0	1	1	1	1	0.0338949
LMLN2	0	0	1	0	0	1	1	1	1	0.0338949
LRIT2	1	0	0	0	0	1	1	1	1	0.0338949
LRWD1	1	1	2	1	1	2	2	2	2	0.0338949
LSMEM2	0	0	0	1	0	1	1	1	1	0.0338949
MAGEE2	0	0	0	1	0	1	1	1	1	0.0338949
MAP4K4	2	2	1	2	2	1	1	1	1	0.0338949
MIR100	0	0	0	3	0	3	3	3	3	0.0338949
MIR10A	0	0	0	2	0	2	2	2	2	0.0338949
MIR10B	0	0	0	2	0	2	2	2	2	0.0338949
MIR1282	0	0	0	1	0	1	1	1	1	0.0338949
MIR129-1	1	1	1	2	1	2	2	2	2	0.0338949
MIR129-2	1	1	1	2	1	2	2	2	2	0.0338949
MIR140	0	0	0	1	0	1	1	1	1	0.0338949
MIR15A	1	1	1	2	1	2	2	2	2	0.0338949
MIR15B	1	1	1	2	1	2	2	2	2	0.0338949
MIR185	0	0	0	1	0	1	1	1	1	0.0338949
MIR187	0	0	0	1	0	1	1	1	1	0.0338949
MIR193A	0	0	0	2	0	2	2	2	2	0.0338949
MIR193B	0	0	0	2	0	2	2	2	2	0.0338949
MIR199A1	1	1	1	3	1	3	3	3	3	0.0338949
MIR199A2	1	1	1	3	1	3	3	3	3	0.0338949
MIR199B	1	1	1	3	1	3	3	3	3	0.0338949
MIR203B	1	0	0	0	0	1	1	1	1	0.0338949
MIR21	0	0	0	1	0	1	1	1	1	0.0338949
MIR223	0	0	0	1	0	1	1	1	1	0.0338949
MIR31	0	0	0	1	0	1	1	1	1	0.0338949
MIR339	0	0	0	1	0	1	1	1	1	0.0338949
MIR433	0	0	0	1	0	1	1	1	1	0.0338949
MIR489	0	0	0	1	0	1	1	1	1	0.0338949
MIR490	0	0	0	1	0	1	1	1	1	0.0338949
MIR652	0	0	0	1	0	1	1	1	1	0.0338949
MIR671	0	0	0	1	0	1	1	1	1	0.0338949
MIR873	0	0	0	1	0	1	1	1	1	0.0338949
MIR99A	0	0	0	3	0	3	3	3	3	0.0338949
MIR99B	0	0	0	3	0	3	3	3	3	0.0338949
MIRLET7A1	0	0	0	3	0	3	3	3	3	0.0338949
MIRLET7A3	0	0	0	3	0	3	3	3	3	0.0338949
MIRLET7F2	0	0	0	3	0	3	3	3	3	0.0338949
NHLRC4	2	3	2	2	2	3	3	3	3	0.0338949
NLRP10	0	0	0	0	1	1	1	1	1	0.0338949
NPB	0	2	0	0	0	2	2	2	2	0.0338949
NPW	0	2	0	0	0	2	2	2	2	0.0338949
OPTC	1	1	2	1	1	2	2	2	2	0.0338949
PBX4	0	1	0	0	0	1	1	1	1	0.0338949
PCDHB16	0	0	0	0	1	1	1	1	1	0.0338949
PCDHB6	1	0	0	0	0	1	1	1	1	0.0338949
PHF3	2	2	2	1	2	1	1	1	1	0.0338949
PMAIP1	0	1	0	0	0	1	1	1	1	0.0338949
PMM1	3	3	3	2	3	2	2	2	2	0.0338949
PMM2	3	3	3	2	3	2	2	2	2	0.0338949
PPM1N	0	0	0	0	1	1	1	1	1	0.0338949
PRR35	2	3	2	2	2	3	3	3	3	0.0338949
PRR9	0	0	0	0	1	1	1	1	1	0.0338949
RBM17	2	2	2	1	2	1	1	1	1	0.0338949
RNF14	2	1	2	2	2	1	1	1	1	0.0338949
RNF225	0	1	0	0	0	1	1	1	1	0.0338949
SCFD2	1	2	2	2	2	1	1	1	1	0.0338949
SP8	0	1	0	0	0	1	1	1	1	0.0338949
SRRM5	0	0	1	0	0	1	1	1	1	0.0338949
TEX11	0	0	0	0	1	1	1	1	1	0.0338949
UFSP1	0	0	1	0	0	1	1	1	1	0.0338949
UMOD	2	2	2	2	1	1	1	1	1	0.0338949
UNCX	0	1	0	0	0	1	1	1	1	0.0338949
UTS2B	0	0	0	1	0	1	1	1	1	0.0338949
WFDC13	0	1	0	0	0	1	1	1	1	0.0338949
ZBED9	0	0	1	0	0	1	1	1	1	0.0338949
ZFP57	0	0	0	1	0	1	1	1	1	0.0338949
HNRNPH1	4	3	3	3	4	2	2	3	2	0.0361806
HNRNPH2	4	3	3	3	4	2	2	3	2	0.0361806
MIR374A	1	0	0	1	1	2	1	2	2	0.0361806
MIR374B	1	0	0	1	1	2	1	2	2	0.0361806
PCDHGB4	1	0	1	0	1	2	2	1	2	0.0361806
PCDHGB5	1	0	1	0	1	2	2	1	2	0.0361806
ZNF383	1	1	1	0	0	1	2	2	2	0.0361806
C10orf95	0	0	0	0	0	1	0	1	1	0.0368884
C2orf92	0	0	0	0	0	1	0	1	1	0.0368884
C6orf226	0	0	0	0	0	1	1	0	1	0.0368884
CCDC192	0	0	0	0	0	1	0	1	1	0.0368884
CFB	1	1	1	1	1	2	2	1	2	0.0368884
CTXND2	0	0	0	0	0	1	0	1	1	0.0368884
DEFB115	0	0	0	0	0	1	1	0	1	0.0368884
DPEP2NB	0	0	0	0	0	1	0	1	1	0.0368884
FDCSP	0	0	0	0	0	0	1	1	1	0.0368884
FREM3	0	0	0	0	0	1	1	0	1	0.0368884
HBE1	0	0	0	0	0	1	1	0	1	0.0368884
HIGD2A	1	1	1	1	1	1	2	2	2	0.0368884
HIGD2B	1	1	1	1	1	1	2	2	2	0.0368884
IER2	2	2	2	2	2	3	2	3	3	0.0368884
IER5	2	2	2	2	2	3	2	3	3	0.0368884
IER5L	2	2	2	2	2	3	2	3	3	0.0368884
KDM5C	1	1	1	1	1	2	2	1	2	0.0368884
KDM5D	1	1	1	1	1	2	2	1	2	0.0368884
LRPPRC	0	0	0	0	0	1	0	1	1	0.0368884
LTB4R	1	1	1	1	1	1	2	2	2	0.0368884
LTB4R2	1	1	1	1	1	1	2	2	2	0.0368884
MFSD10	0	0	0	0	0	1	0	1	1	0.0368884
MIR504	0	0	0	0	0	1	0	1	1	0.0368884
MIR653	0	0	0	0	0	0	1	1	1	0.0368884
MIR770	0	0	0	0	0	1	1	0	1	0.0368884
PATE4	0	0	0	0	0	1	1	0	1	0.0368884
PCDHGA6	0	0	0	0	0	1	1	0	1	0.0368884
PCDHGA9	0	0	0	0	0	1	1	0	1	0.0368884
PCDHGB6	0	0	0	0	0	1	1	0	1	0.0368884
PCDHGB7	0	0	0	0	0	1	1	0	1	0.0368884
PPP3R2	0	0	0	0	0	1	1	0	1	0.0368884
PRR18	0	0	0	0	0	1	1	0	1	0.0368884
SMIM36	0	0	0	0	0	1	0	1	1	0.0368884
SMIM38	0	0	0	0	0	1	1	0	1	0.0368884
SMIM41	0	0	0	0	0	1	1	0	1	0.0368884
SRY	0	0	0	0	0	1	1	0	1	0.0368884
TEX54	0	0	0	0	0	1	1	0	1	0.0368884
TIMM10B	1	1	1	1	1	2	2	1	2	0.0368884
TMEM249	0	0	0	0	0	1	0	1	1	0.0368884
TMEM41A	1	1	1	1	1	0	0	0	1	0.0368884
WFDC12	0	0	0	0	0	1	1	0	1	0.0368884
ZBTB42	0	0	0	0	0	1	1	0	1	0.0368884
ZNF142	0	0	0	0	0	1	1	0	1	0.0368884
ZNF235	1	1	1	1	1	0	0	0	1	0.0368884
EIF4A1	4	3	2	2	2	1	1	2	1	0.0370705
FAM110A	3	4	3	3	2	4	4	5	4	0.0370705
FAM110B	3	4	3	3	2	4	4	5	4	0.0370705
FAM110C	3	4	3	3	2	4	4	5	4	0.0370705
FAM110D	3	4	3	3	2	4	4	5	4	0.0370705
MIR29B1	0	1	0	2	0	2	3	2	2	0.0370705
MIR29B2	0	1	0	2	0	2	3	2	2	0.0370705
PPP1R14A	3	4	2	4	4	5	5	5	4	0.0370705
PPP1R14B	3	4	2	4	4	5	5	5	4	0.0370705
PPP1R14C	3	4	2	4	4	5	5	5	4	0.0370705
PPP1R14D	3	4	2	4	4	5	5	5	4	0.0370705
MIR98	1	1	1	3	1	4	4	2	3	0.0388671
MIRLET7G	1	1	1	3	1	4	4	2	3	0.0388671
MIRLET7I	1	1	1	3	1	4	4	2	3	0.0388671
SPDYE1	1	2	3	1	2	3	3	3	16	0.0388671
SPDYE11	1	2	3	1	2	3	3	3	16	0.0388671
SPDYE16	1	2	3	1	2	3	3	3	16	0.0388671
SPDYE17	1	2	3	1	2	3	3	3	16	0.0388671
SPDYE2	1	2	3	1	2	3	3	3	16	0.0388671
SPDYE21P	1	2	3	1	2	3	3	3	16	0.0388671
SPDYE2B	1	2	3	1	2	3	3	3	16	0.0388671
SPDYE3	1	2	3	1	2	3	3	3	16	0.0388671
SPDYE4	1	2	3	1	2	3	3	3	16	0.0388671
SPDYE5	1	2	3	1	2	3	3	3	16	0.0388671
SPDYE6	1	2	3	1	2	3	3	3	16	0.0388671
SPDYE8P	1	2	3	1	2	3	3	3	16	0.0388671
SPDYE9P	1	2	3	1	2	3	3	3	16	0.0388671
DUSP18	3	1	11	2	2	1	1	0	1	0.0397734
HLA-DRB1	3	2	2	2	5	1	0	0	2	0.0397734
HLA-DRB5	3	2	2	2	5	1	0	0	2	0.0397734
C15orf65	2	1	1	1	0	2	2	2	2	0.0399796
C9orf116	2	1	1	1	0	2	2	2	2	0.0399796
CRIPT	4	4	4	3	6	3	3	3	3	0.0399796
DNAJC19	1	2	6	2	2	1	1	1	1	0.0399796
GALR1	1	1	0	2	1	2	2	2	2	0.0399796
GALR3	1	1	0	2	1	2	2	2	2	0.0399796
INS	1	1	0	1	1	2	2	1	2	0.0399796
INS-IGF2	1	1	0	1	1	2	2	1	2	0.0399796
MIR221	1	0	1	2	1	2	2	2	2	0.0399796
MIR222	1	0	1	2	1	2	2	2	2	0.0399796
MIR23A	1	1	1	2	0	2	2	2	2	0.0399796
MIR23B	1	1	1	2	0	2	2	2	2	0.0399796
MIR27A	1	1	1	2	0	2	2	2	2	0.0399796
MIR27B	1	1	1	2	0	2	2	2	2	0.0399796
MIR30C1	1	0	1	2	1	2	2	2	2	0.0399796
MIR30C2	1	0	1	2	1	2	2	2	2	0.0399796
NACA	5	2	1	2	2	1	1	1	1	0.0399796
POLR1C	4	4	4	3	6	3	3	3	3	0.0399796
POLR2C	4	4	4	3	6	3	3	3	3	0.0399796
PPP2R2A	11	5	5	4	5	4	4	4	4	0.0399796
PPP2R2B	11	5	5	4	5	4	4	4	4	0.0399796
PPP2R2C	11	5	5	4	5	4	4	4	4	0.0399796
PPP2R2D	11	5	5	4	5	4	4	4	4	0.0399796
RB1CC1	3	2	1	2	2	1	1	1	1	0.0399796
RNF113A	1	1	0	1	2	2	2	2	2	0.0399796
RNF113B	1	1	0	1	2	2	2	2	2	0.0399796
SUB1	1	3	2	2	2	1	1	1	1	0.0399796
ZNF112	1	1	1	0	1	2	2	1	2	0.0399796
C19orf33	0	0	0	0	0	1	2	0	2	0.040424
C20orf141	0	0	0	0	0	1	0	1	2	0.040424
GBP2	0	0	0	0	0	2	1	0	1	0.040424
GOLGA2	1	1	1	1	1	2	2	1	19	0.040424
GOLGA6A	1	1	1	1	1	2	2	1	19	0.040424
GOLGA6B	1	1	1	1	1	2	2	1	19	0.040424
GOLGA6C	1	1	1	1	1	2	2	1	19	0.040424
GOLGA6D	1	1	1	1	1	2	2	1	19	0.040424
GOLGA8A	1	1	1	1	1	2	2	1	19	0.040424
GOLGA8B	1	1	1	1	1	2	2	1	19	0.040424
GOLGA8F	1	1	1	1	1	2	2	1	19	0.040424
GOLGA8G	1	1	1	1	1	2	2	1	19	0.040424
GOLGA8H	1	1	1	1	1	2	2	1	19	0.040424
GOLGA8J	1	1	1	1	1	2	2	1	19	0.040424
GOLGA8K	1	1	1	1	1	2	2	1	19	0.040424
GOLGA8M	1	1	1	1	1	2	2	1	19	0.040424
GOLGA8N	1	1	1	1	1	2	2	1	19	0.040424
GOLGA8O	1	1	1	1	1	2	2	1	19	0.040424
GOLGA8Q	1	1	1	1	1	2	2	1	19	0.040424
GOLGA8R	1	1	1	1	1	2	2	1	19	0.040424
GOLGA8S	1	1	1	1	1	2	2	1	19	0.040424
GOLGA8T	1	1	1	1	1	2	2	1	19	0.040424
HUS1	1	1	1	1	1	2	3	1	2	0.040424
HUS1B	1	1	1	1	1	2	3	1	2	0.040424
IGKV1OR2-108	0	0	0	0	0	1	2	0	1	0.040424
SEC61G	1	1	1	1	1	2	5	2	1	0.040424
SERPINA1	1	1	1	1	1	6	2	1	2	0.040424
SERPINA2	1	1	1	1	1	6	2	1	2	0.040424
SH2D1B	0	0	0	0	0	2	2	0	1	0.040424
SMIM40	0	0	0	0	0	2	0	1	2	0.040424
IGKV6-21	0	0	0	0	0	5	2	0	3	0.0416201
IGKV6D-21	0	0	0	0	0	5	2	0	3	0.0416201
IGKV6D-41	0	0	0	0	0	5	2	0	3	0.0416201
RBMY1A1	0	0	0	0	0	10	1	0	6	0.0416201
RBMY1B	0	0	0	0	0	10	1	0	6	0.0416201
RBMY1D	0	0	0	0	0	10	1	0	6	0.0416201
RBMY1E	0	0	0	0	0	10	1	0	6	0.0416201
RBMY1F	0	0	0	0	0	10	1	0	6	0.0416201
RBMY1J	0	0	0	0	0	10	1	0	6	0.0416201
SEMG1	0	0	0	0	0	3	6	0	2	0.0416201
SEMG2	0	0	0	0	0	3	6	0	2	0.0416201
TRAV18	0	0	0	0	0	9	11	0	1	0.0416201
ACKR4	4	2	3	3	2	4	4	4	4	0.0420634
CUL2	4	2	2	1	4	1	1	1	1	0.0420634
CXCR1	4	2	3	3	2	4	4	4	4	0.0420634
CXCR2	4	2	3	3	2	4	4	4	4	0.0420634
CXCR5	4	2	3	3	2	4	4	4	4	0.0420634
MIR219A2	0	0	1	2	1	2	2	2	2	0.0420634
MIR219B	0	0	1	2	1	2	2	2	2	0.0420634
MIR30A	0	0	1	4	1	4	4	4	4	0.0420634
MIR30B	0	0	1	4	1	4	4	4	4	0.0420634
MIR30D	0	0	1	4	1	4	4	4	4	0.0420634
MIR30E	0	0	1	4	1	4	4	4	4	0.0420634
THOC7	3	3	2	1	2	1	1	1	1	0.0420634
TRAPPC13	3	1	3	2	2	1	1	1	1	0.0420634
AP3S1	9	5	4	4	3	3	3	3	3	0.0431144
AP3S2	9	5	4	4	3	3	3	3	3	0.0431144
AP4S1	9	5	4	4	3	3	3	3	3	0.0431144
C1D	2	4	2	1	3	1	1	1	1	0.0431144
CSNK1A1	5	4	2	1	2	1	1	1	1	0.0431144
GLUL	6	2	3	1	2	1	1	1	1	0.0431144
HNRNPA2B1	2	4	3	1	2	1	1	1	1	0.0431144
LPA	1	1	1	1	0	3	2	1	2	0.0431144
NUCKS1	3	6	7	2	3	2	2	2	2	0.0431144
PRSS56	1	1	1	1	0	3	2	1	2	0.0431144
RAD51AP1	3	6	7	2	3	2	2	2	2	0.0431144
RWDD1	8	3	2	2	1	1	1	1	1	0.0431144
TAF13	4	2	3	1	2	1	1	1	1	0.0431144
TCAF1	2	2	1	2	2	3	4	2	3	0.0431144
TCAF2	2	2	1	2	2	3	4	2	3	0.0431144
TCAF2C	2	2	1	2	2	3	4	2	3	0.0431144
PRELID1	11	5	6	4	8	4	4	4	4	0.0441713
PRELID2	11	5	6	4	8	4	4	4	4	0.0441713
PRELID3A	11	5	6	4	8	4	4	4	4	0.0441713
PRELID3B	11	5	6	4	8	4	4	4	4	0.0441713
SSX1	0	1	1	1	1	14	4	1	8	0.0441713
SSX2	0	1	1	1	1	14	4	1	8	0.0441713
SSX2B	0	1	1	1	1	14	4	1	8	0.0441713
SSX3	0	1	1	1	1	14	4	1	8	0.0441713
SSX4	0	1	1	1	1	14	4	1	8	0.0441713
SSX4B	0	1	1	1	1	14	4	1	8	0.0441713
SSX5	0	1	1	1	1	14	4	1	8	0.0441713
SSX7	0	1	1	1	1	14	4	1	8	0.0441713
KRTAP4-12	0	2	1	0	0	7	3	1	3	0.0443784
KRTAP4-6	0	2	1	0	0	7	3	1	3	0.0443784
KRTAP4-7	0	2	1	0	0	7	3	1	3	0.0443784
ANKRD62	0	2	0	0	1	7	10	8	1	0.0453129
ZNF195	3	5	0	0	0	21	7	13	3	0.0453129
ZNF429	3	5	0	0	0	21	7	13	3	0.0453129
TAS2R10	2	14	3	4	6	25	24	6	15	0.0490901
TAS2R13	2	14	3	4	6	25	24	6	15	0.0490901
TAS2R14	2	14	3	4	6	25	24	6	15	0.0490901
TAS2R19	2	14	3	4	6	25	24	6	15	0.0490901
TAS2R20	2	14	3	4	6	25	24	6	15	0.0490901
TAS2R3	2	14	3	4	6	25	24	6	15	0.0490901
TAS2R30	2	14	3	4	6	25	24	6	15	0.0490901
TAS2R31	2	14	3	4	6	25	24	6	15	0.0490901
TAS2R42	2	14	3	4	6	25	24	6	15	0.0490901
TAS2R43	2	14	3	4	6	25	24	6	15	0.0490901
TAS2R45	2	14	3	4	6	25	24	6	15	0.0490901
TAS2R46	2	14	3	4	6	25	24	6	15	0.0490901
TAS2R50	2	14	3	4	6	25	24	6	15	0.0490901
TAS2R7	2	14	3	4	6	25	24	6	15	0.0490901
TAS2R8	2	14	3	4	6	25	24	6	15	0.0490901
TAS2R9	2	14	3	4	6	25	24	6	15	0.0490901
CENPJ	1	2	2	1	1	4	2	2	4	0.0495346
CMTM1	0	0	1	0	1	2	1	1	2	0.0495346
CMTM2	0	0	0	1	1	2	2	1	1	0.0495346
KRTAP15-1	0	1	1	0	0	2	1	2	1	0.0495346
SCARNA2	0	1	0	1	0	2	2	1	1	0.0495346
SCART1	0	0	1	0	1	2	2	1	1	0.0495346
TCP10	1	2	2	1	1	4	2	2	4	0.0495346
TCP10L	1	2	2	1	1	4	2	2	4	0.0495346
TCP10L2	1	2	2	1	1	4	2	2	4	0.0495346
ZNF420	1	0	1	0	0	2	1	1	2	0.0495346

## Sheet: S3
Table S3: Cancer Prone vs Cancer Resistant: a two-group statistical comparison. List of the significant microRNAs resulting from the unpaired 2-group wilcoxon test (p-value <0.05) applied on the total genomic CNVs landscape of the selected species.
ID	[Hg]	[Ng]	[Dn]	[La]	[Ml]	[Mm]	[Rn]	[Cf]	[Hs]	p-value
Cancer-	Resistant	Resistant	Resistant	Resistant	Resistant	Prone	Prone	Prone	Prone
MIR424	0	0	0	0	0	1	2	1	1	0.00927678
MIR371A	0	0	0	0	0	4	8	2	2	0.0104083
MIR372	0	0	0	0	0	4	8	2	2	0.0104083
MIR103A1	0	0	0	2	1	2	3	3	3	0.0218957
MIR103A2	0	0	0	2	1	2	3	3	3	0.0218957
MIR107	0	0	0	2	1	2	3	3	3	0.0218957
MIR124-1	1	0	0	2	0	3	3	2	3	0.0218957
MIR124-2	1	0	0	2	0	3	3	2	3	0.0218957
MIR124-3	1	0	0	2	0	3	3	2	3	0.0218957
MIR506	0	0	0	5	0	2	11	6	11	0.0289182
MIR509-1	0	0	0	5	0	2	11	6	11	0.0289182
MIR511	0	0	0	5	0	2	11	6	11	0.0289182
MIR514A1	0	0	0	5	0	2	11	6	11	0.0289182
MIR514A3	0	0	0	5	0	2	11	6	11	0.0289182
MIR514B	0	0	0	5	0	2	11	6	11	0.0289182
MIR378A	0	1	0	1	0	2	2	1	3	0.0304008
MIR378B	0	1	0	1	0	2	2	1	3	0.0304008
MIR378D2	0	1	0	1	0	2	2	1	3	0.0304008
MIR1-1	0	0	0	3	0	3	3	4	3	0.0318231
MIR1-2	0	0	0	3	0	3	3	4	3	0.0318231
MIR206	0	0	0	3	0	3	3	4	3	0.0318231
MIR340	0	0	0	1	0	1	2	1	1	0.0318231
MIR542	0	0	0	1	0	1	3	1	1	0.0318231
MIR100	0	0	0	3	0	3	3	3	3	0.0338949
MIR10A	0	0	0	2	0	2	2	2	2	0.0338949
MIR10B	0	0	0	2	0	2	2	2	2	0.0338949
MIR1282	0	0	0	1	0	1	1	1	1	0.0338949
MIR129-1	1	1	1	2	1	2	2	2	2	0.0338949
MIR129-2	1	1	1	2	1	2	2	2	2	0.0338949
MIR140	0	0	0	1	0	1	1	1	1	0.0338949
MIR15A	1	1	1	2	1	2	2	2	2	0.0338949
MIR15B	1	1	1	2	1	2	2	2	2	0.0338949
MIR185	0	0	0	1	0	1	1	1	1	0.0338949
MIR187	0	0	0	1	0	1	1	1	1	0.0338949
MIR193A	0	0	0	2	0	2	2	2	2	0.0338949
MIR193B	0	0	0	2	0	2	2	2	2	0.0338949
MIR199A1	1	1	1	3	1	3	3	3	3	0.0338949
MIR199A2	1	1	1	3	1	3	3	3	3	0.0338949
MIR199B	1	1	1	3	1	3	3	3	3	0.0338949
MIR203B	1	0	0	0	0	1	1	1	1	0.0338949
MIR21	0	0	0	1	0	1	1	1	1	0.0338949
MIR223	0	0	0	1	0	1	1	1	1	0.0338949
MIR31	0	0	0	1	0	1	1	1	1	0.0338949
MIR339	0	0	0	1	0	1	1	1	1	0.0338949
MIR433	0	0	0	1	0	1	1	1	1	0.0338949
MIR489	0	0	0	1	0	1	1	1	1	0.0338949
MIR490	0	0	0	1	0	1	1	1	1	0.0338949
MIR652	0	0	0	1	0	1	1	1	1	0.0338949
MIR671	0	0	0	1	0	1	1	1	1	0.0338949
MIR873	0	0	0	1	0	1	1	1	1	0.0338949
MIR99A	0	0	0	3	0	3	3	3	3	0.0338949
MIR99B	0	0	0	3	0	3	3	3	3	0.0338949
MIRLET7A1	0	0	0	3	0	3	3	3	3	0.0338949
MIRLET7A3	0	0	0	3	0	3	3	3	3	0.0338949
MIRLET7F2	0	0	0	3	0	3	3	3	3	0.0338949
MIR374A	1	0	0	1	1	2	1	2	2	0.0361806
MIR374B	1	0	0	1	1	2	1	2	2	0.0361806
MIR504	0	0	0	0	0	1	0	1	1	0.0368884
MIR653	0	0	0	0	0	0	1	1	1	0.0368884
MIR770	0	0	0	0	0	1	1	0	1	0.0368884
MIR29B1	0	1	0	2	0	2	3	2	2	0.0370705
MIR29B2	0	1	0	2	0	2	3	2	2	0.0370705
MIR98	1	1	1	3	1	4	4	2	3	0.0388671
MIRLET7G	1	1	1	3	1	4	4	2	3	0.0388671
MIRLET7I	1	1	1	3	1	4	4	2	3	0.0388671
MIR221	1	0	1	2	1	2	2	2	2	0.0399796
MIR222	1	0	1	2	1	2	2	2	2	0.0399796
MIR23A	1	1	1	2	0	2	2	2	2	0.0399796
MIR23B	1	1	1	2	0	2	2	2	2	0.0399796
MIR27A	1	1	1	2	0	2	2	2	2	0.0399796
MIR27B	1	1	1	2	0	2	2	2	2	0.0399796
MIR30C1	1	0	1	2	1	2	2	2	2	0.0399796
MIR30C2	1	0	1	2	1	2	2	2	2	0.0399796
MIR219A2	0	0	1	2	1	2	2	2	2	0.0420634
MIR219B	0	0	1	2	1	2	2	2	2	0.0420634
MIR30A	0	0	1	4	1	4	4	4	4	0.0420634
MIR30B	0	0	1	4	1	4	4	4	4	0.0420634
MIR30D	0	0	1	4	1	4	4	4	4	0.0420634
MIR30E	0	0	1	4	1	4	4	4	4	0.0420634

## Sheet: S4
Table S4: Pathway analysis – extended version. Gene Over-Representation Analysis (ORA) using both Gene Ontology (biological processes) and Pathway analysis (KEGG, PANTHER, Reactome and Wikipathway) as enrichment categories. ORA was performed by the WebGesTalt functional enrichment analysis tool available at http://www.webgestalt.org. The enrichment test used Benjamini-Hochberg's FDR correction (F…
	Enrichment_category_1	Enrichment_category_2	Reference_list	FDR_method	Significance_level
A	gene_ontology	biological_proc	genome	BH	FDR<0.05
B	Pathway	Kegg	genome	BH	FDR<0.05
C	Pathway	Panther	genome	BH	FDR<0.05
D	Pathway	Reactome	genome	BH	FDR<0.05
E	Pathway	Wikipathway	genome	BH	FDR<0.05
A	geneSet	description	enrichmentRatio	pValue	FDR	Genes
	GO:0001580	detection of chemical stimulus involved in sensory perception of bitter taste	24221322537112	2.22045e-16	2.01861e-12	TAS2R10;TAS2R13;TAS2R14;TAS2R19;TAS2R20;TAS2R3;TAS2R30;TAS2R31;TAS2R43;TAS2R46;TAS2R50;TAS2R7;TAS2R8;TAS2R9
	GO:0050913	sensory perception of bitter taste	21.9682	8.88178e-16	4.03722e-12	TAS2R10;TAS2R13;TAS2R14;TAS2R19;TAS2R20;TAS2R3;TAS2R30;TAS2R31;TAS2R43;TAS2R46;TAS2R50;TAS2R7;TAS2R8;TAS2R9
	GO:0050912	detection of chemical stimulus involved in sensory perception of taste	20.9918	1.88738e-15	5.71939e-12	TAS2R10;TAS2R13;TAS2R14;TAS2R19;TAS2R20;TAS2R3;TAS2R30;TAS2R31;TAS2R43;TAS2R46;TAS2R50;TAS2R7;TAS2R8;TAS2R9
	GO:0050909	sensory perception of taste	14.5328	5.31686e-13	1.20839e-09	TAS2R10;TAS2R13;TAS2R14;TAS2R19;TAS2R20;TAS2R3;TAS2R30;TAS2R31;TAS2R43;TAS2R46;TAS2R50;TAS2R7;TAS2R8;TAS2R9
	GO:0006346	methylation-dependent chromatin silencing	28.41	1.36474e-10	2.48138e-07	MBD1;MBD2;MBD3;MBD3L1;MBD3L2;MBD3L3;MBD3L4;MBD3L5
	GO:0007030	Golgi organization	7.44195	1.67911e-09	2.54414e-06	SYNE1;GOLGA2;GOLGA6A;GOLGA6B;GOLGA6C;GOLGA6D;GOLGA8A;GOLGA8B;GOLGA8H;GOLGA8J;GOLGA8M;GOLGA8N;GOLGA8O;GOLGA8R;CSNK1A1
	GO:0051225	spindle assembly	7.76246	1.25338e-08	1.62778e-05	GOLGA2;GOLGA6A;GOLGA6B;GOLGA6C;GOLGA6D;GOLGA8A;GOLGA8B;GOLGA8H;GOLGA8J;GOLGA8M;GOLGA8N;GOLGA8O;GOLGA8R
	GO:0007051	spindle organization	5.01233	2.12814e-06	0.00241836	GOLGA2;GOLGA6A;GOLGA6B;GOLGA6C;GOLGA6D;GOLGA8A;GOLGA8B;GOLGA8H;GOLGA8J;GOLGA8M;GOLGA8N;GOLGA8O;GOLGA8R
	GO:0006342	chromatin silencing	7.68688	2.48792e-06	0.00251308	HIST4H4;MBD1;MBD2;MBD3;MBD3L1;MBD3L2;MBD3L3;MBD3L4;MBD3L5
B	geneSet	description	enrichmentRatio	pValue	FDR	Genes
	hsa05206	MicroRNAs in cancer	7.79516	0	0	MIR103A1;MIR103A2;MIR107;MIR124-1;MIR124-2;MIR124-3;MIR1-1;MIR1-2;MIR206;MIR100;MIR10A;MIR10B;MIR129-1;MIR129-2;MIR15A;MIR15B;MIR193B;MIR199A1;MIR199A2;MIR199B;MIR203B;MIR21;MIR223;MIR31;MIR99A;MIRLET7A1;MIRLET7A3;MIRLET7F2;MIR29B1;MIR29B2;MIRLET7G;MIRLET7I;MIR221;MIR222;MIR23A;MIR23B;MIR27A;MIR27B;MIR30C1;MIR30C2;MIR30A;MIR30B;MIR30D;MIR30E
	hsa04742	Taste transduction	10.2114	1.94023e-12	3.16257e-10	TAS2R10;TAS2R13;TAS2R14;TAS2R19;TAS2R20;TAS2R3;TAS2R30;TAS2R31;TAS2R42;TAS2R43;TAS2R45;TAS2R46;TAS2R50;TAS2R7;TAS2R8;TAS2R9
	hsa04914	Progesterone-mediated oocyte maturation	5.88574	2.23805e-06	0.000243202	SPDYE1;SPDYE11;SPDYE16;SPDYE17;SPDYE2;SPDYE2B;SPDYE3;SPDYE4;SPDYE5;SPDYE6;INS
	hsa04114	Oocyte meiosis	5.12629	3.34607e-06	0.000272704	PPP3R2;SPDYE1;SPDYE11;SPDYE16;SPDYE17;SPDYE2;SPDYE2B;SPDYE3;SPDYE4;SPDYE5;SPDYE6;INS
C	geneSet	description	enrichmentRatio	pValue	FDR	Genes
	P00012	Cadherin signaling pathway	3.8084	0.000355717	0.040196	PCDHB14;PCDHB7;PCDHGB1;PCDHB16;PCDHB6;PCDHGB4;PCDHGA6;PCDHGB6;PCDHGB7
D	geneSet	description	enrichmentRatio	pValue	FDR	Genes
	R-HSA-420499	Class C/3 (Metabotropic glutamate/pheromone receptors)	26.4511	0	0	TAS2R10;TAS2R13;TAS2R14;TAS2R19;TAS2R20;TAS2R3;TAS2R30;TAS2R31;TAS2R43;TAS2R46;TAS2R50;TAS2R7;TAS2R8;TAS2R9
	R-HSA-500792	GPCR ligand binding	4.08467	7.14559e-10	6.17379e-07	ADRA2C;NPB;NPW;UTS2B;LTB4R;LTB4R2;GALR1;GALR3;ACKR4;CXCR1;CXCR2;CXCR5;TAS2R10;TAS2R13;TAS2R14;TAS2R19;TAS2R20;TAS2R3;TAS2R30;TAS2R31;TAS2R43;TAS2R46;TAS2R50;TAS2R7;TAS2R8;TAS2R9
	R-HSA-418594	G alpha (i) signalling events	4.16996	5.25666e-09	3.02783e-06	CNGB1;ADRA2C;NPB;NPW;GALR1;GALR3;CXCR1;CXCR2;CXCR5;TAS2R10;TAS2R13;TAS2R14;TAS2R19;TAS2R20;TAS2R3;TAS2R30;TAS2R31;TAS2R43;TAS2R46;TAS2R50;TAS2R7;TAS2R8;TAS2R9
	R-HSA-1461957	Beta defensins	11.966	1.58107e-06	0.000683021	DEFB105A;DEFB105B;DEFB130A;DEFB130B;DEFB4A;DEFB4B;DEFB115
	R-HSA-1461973	Defensins	9.66484	6.97956e-06	0.00241214	DEFB105A;DEFB105B;DEFB130A;DEFB130B;DEFB4A;DEFB4B;DEFB115
	R-HSA-6803157	Antimicrobial peptides	5.92131	5.94394e-05	0.0171185	DEFB105A;DEFB105B;DEFB130A;DEFB130B;DEFB4A;DEFB4B;DEFB115;SEMG1
	R-HSA-3214842	HDMs demethylate histones	8.44658	7.0837e-05	0.0174866	HIST1H4D;HIST1H4J;HIST2H4A;HIST4H4;KDM5C;KDM5D
	R-HSA-6803204	TP53 Regulates Transcription of Genes Involved in Cytochrome C Release	14.3592	0.00014714	0.0317823	PMAIP1;PRELID1;PRELID3A;ZNF420
E	geneSet	description	enrichmentRatio	pValue	FDR	Genes
	WP1545	miRNAs involved in DNA damage response	13.2282	7.07723e-12	3.75801e-09	MIR371A;MIR372;MIR542;MIR100;MIR15B;MIRLET7A1;MIR374B;MIR221;MIR222;MIR23A;MIR23B;MIR27A;MIR27B
	WP2059	Alzheimers Disease	5.08777	2.00044e-07	5.31117e-05	MIR124-1;MIR124-2;MIR124-3;MIR10A;MIR129-1;MIR129-2;MIR199B;MIR21;MIR433;MIR671;MIR873;PPP3R2;MIR29B1;MIR30C2;MIR219A2
	WP2249	Metastatic brain tumor	10.9024	1.36543e-05	0.00230738	MIRLET7A1;MIRLET7A3;MIRLET7F2;MIR29B1;MIR29B2;MIRLET7G
	WP2911	miRNA targets in ECM and membrane receptors	8.28242	1.73814e-05	0.00230738	MIR107;MIR15B;MIR30C1;MIR30C2;MIR30B;MIR30D;MIR30E
	WP1544	MicroRNAs in cardiomyocyte hypertrophy	5.0374	2.60662e-05	0.00276823	MIR103A1;MIR103A2;MIR140;MIR15B;MIR185;MIR199A1;MIR199A2;MIR23A;MIR27B;MIR30E
	WP2029	Cell Differentiation - Index	7.26824	0.00015164	0.0125061	MIR1-1;MIR206;MIR199A1;MIR199A2;MIR221;MIR222
	WP3299	let-7 inhibition of ES cell reprogramming	13.5674	0.000164863	0.0125061	MIRLET7A1;MIRLET7F2;MIRLET7G;MIRLET7I
	WP4329	miRNAs involvement in the immune response in sepsis	5.65308	0.000215139	0.0142799	MIR187;MIR199A1;MIR199A2;MIR203B;MIR223;MIR29B1;MIRLET7I
	WP2023	Cell Differentiation - Index expanded	6.10532	0.000403815	0.0238251	MIR1-1;MIR206;MIR199A1;MIR199A2;MIR221;MIR222
	WP3971	Role of Osx and miRNAs in tooth development	7.06635	0.000630146	0.0334608	MIRLET7A1;MIRLET7F2;MIR29B1;MIRLET7G;MIRLET7I
